# Supplementary material
Source: publisher figshare collection journal article supplement (https://frontiersin.figshare.com/ndownloader/files/30569400)
Supplement: Supplementary file 1 [file 30569400]

# **SUPPLEMENTAL FIGURES**


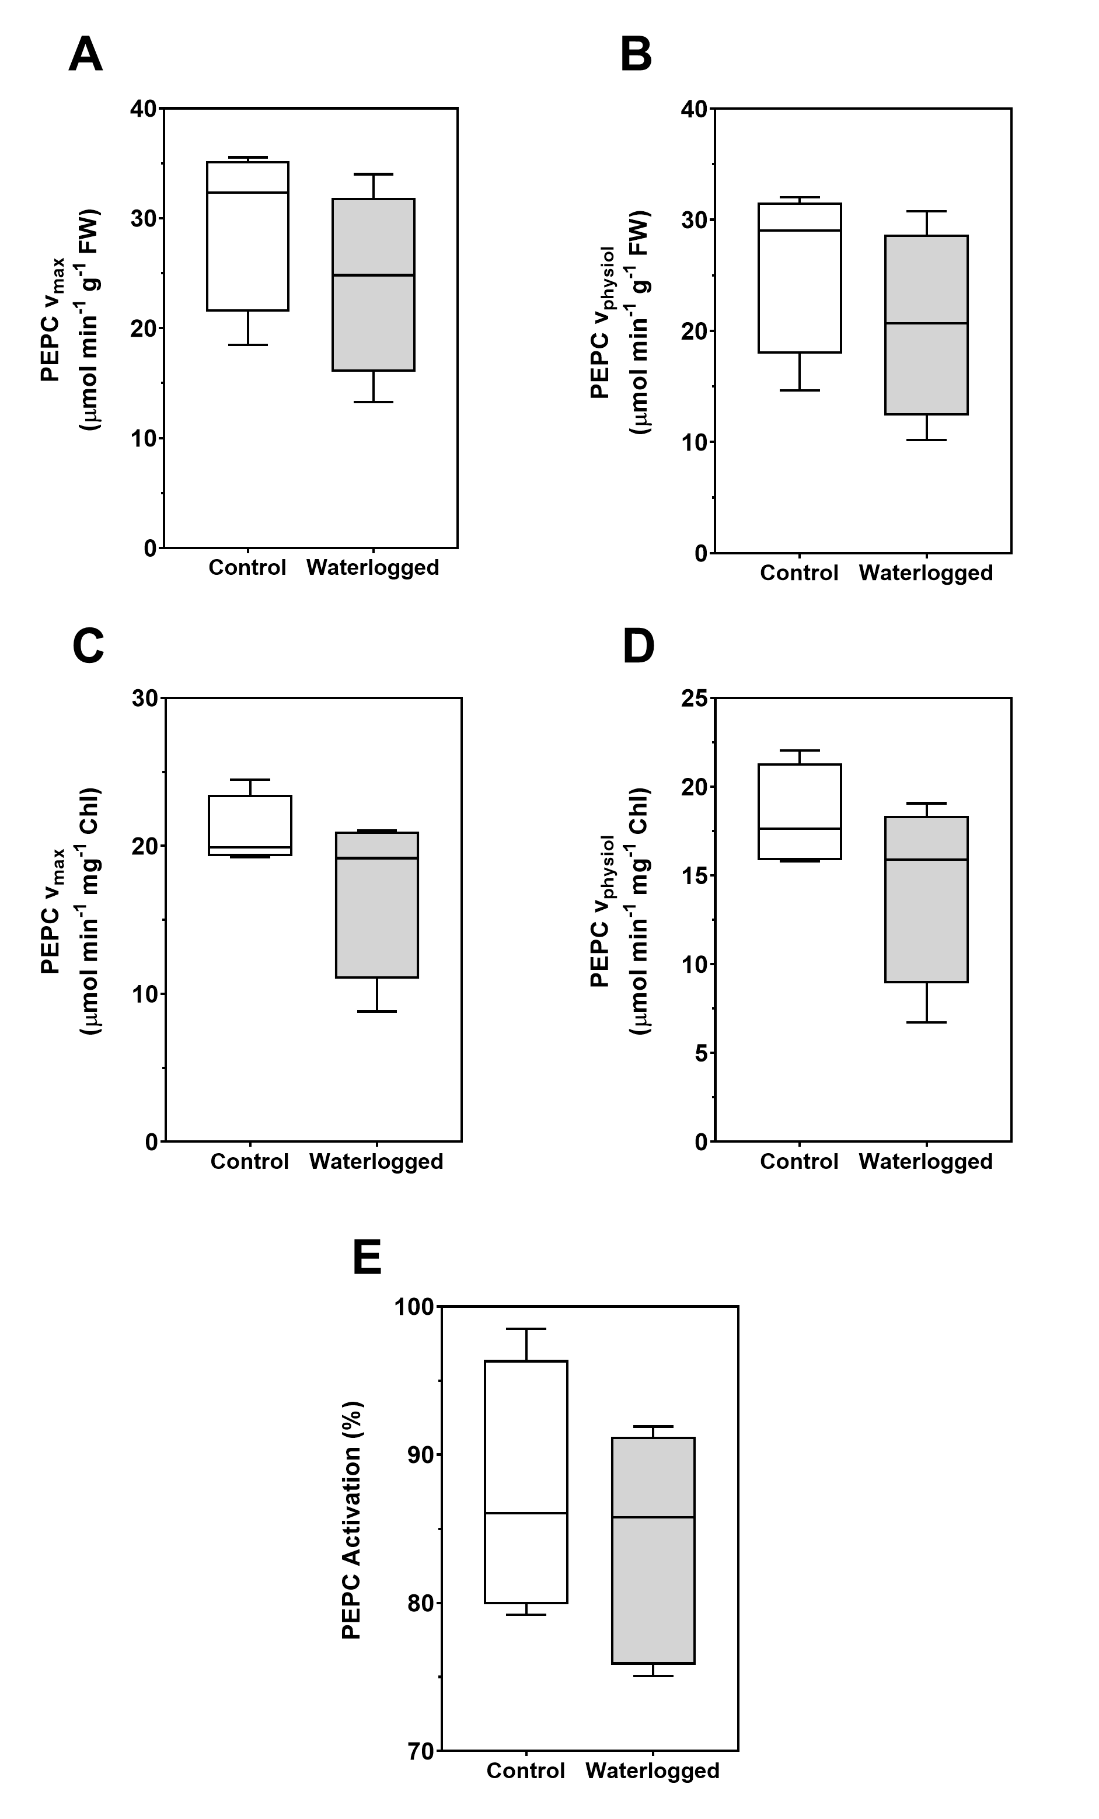


**Figure S1.** Boxplot of the PEPC maximal activity (**A**, **C**), PEPC physiological activity (**B**, **D**), expressed by fresh weight (FW) (**A**, **B**) and chlorophyll content (**C**, **D**), and activation state of PEPC (**E**) in leaves of control plants (white boxes) and waterlogged plants (grey boxes) of *Spartina patens* after 30 days (n = 5, different letters indicate significant differences at p < 0.05).


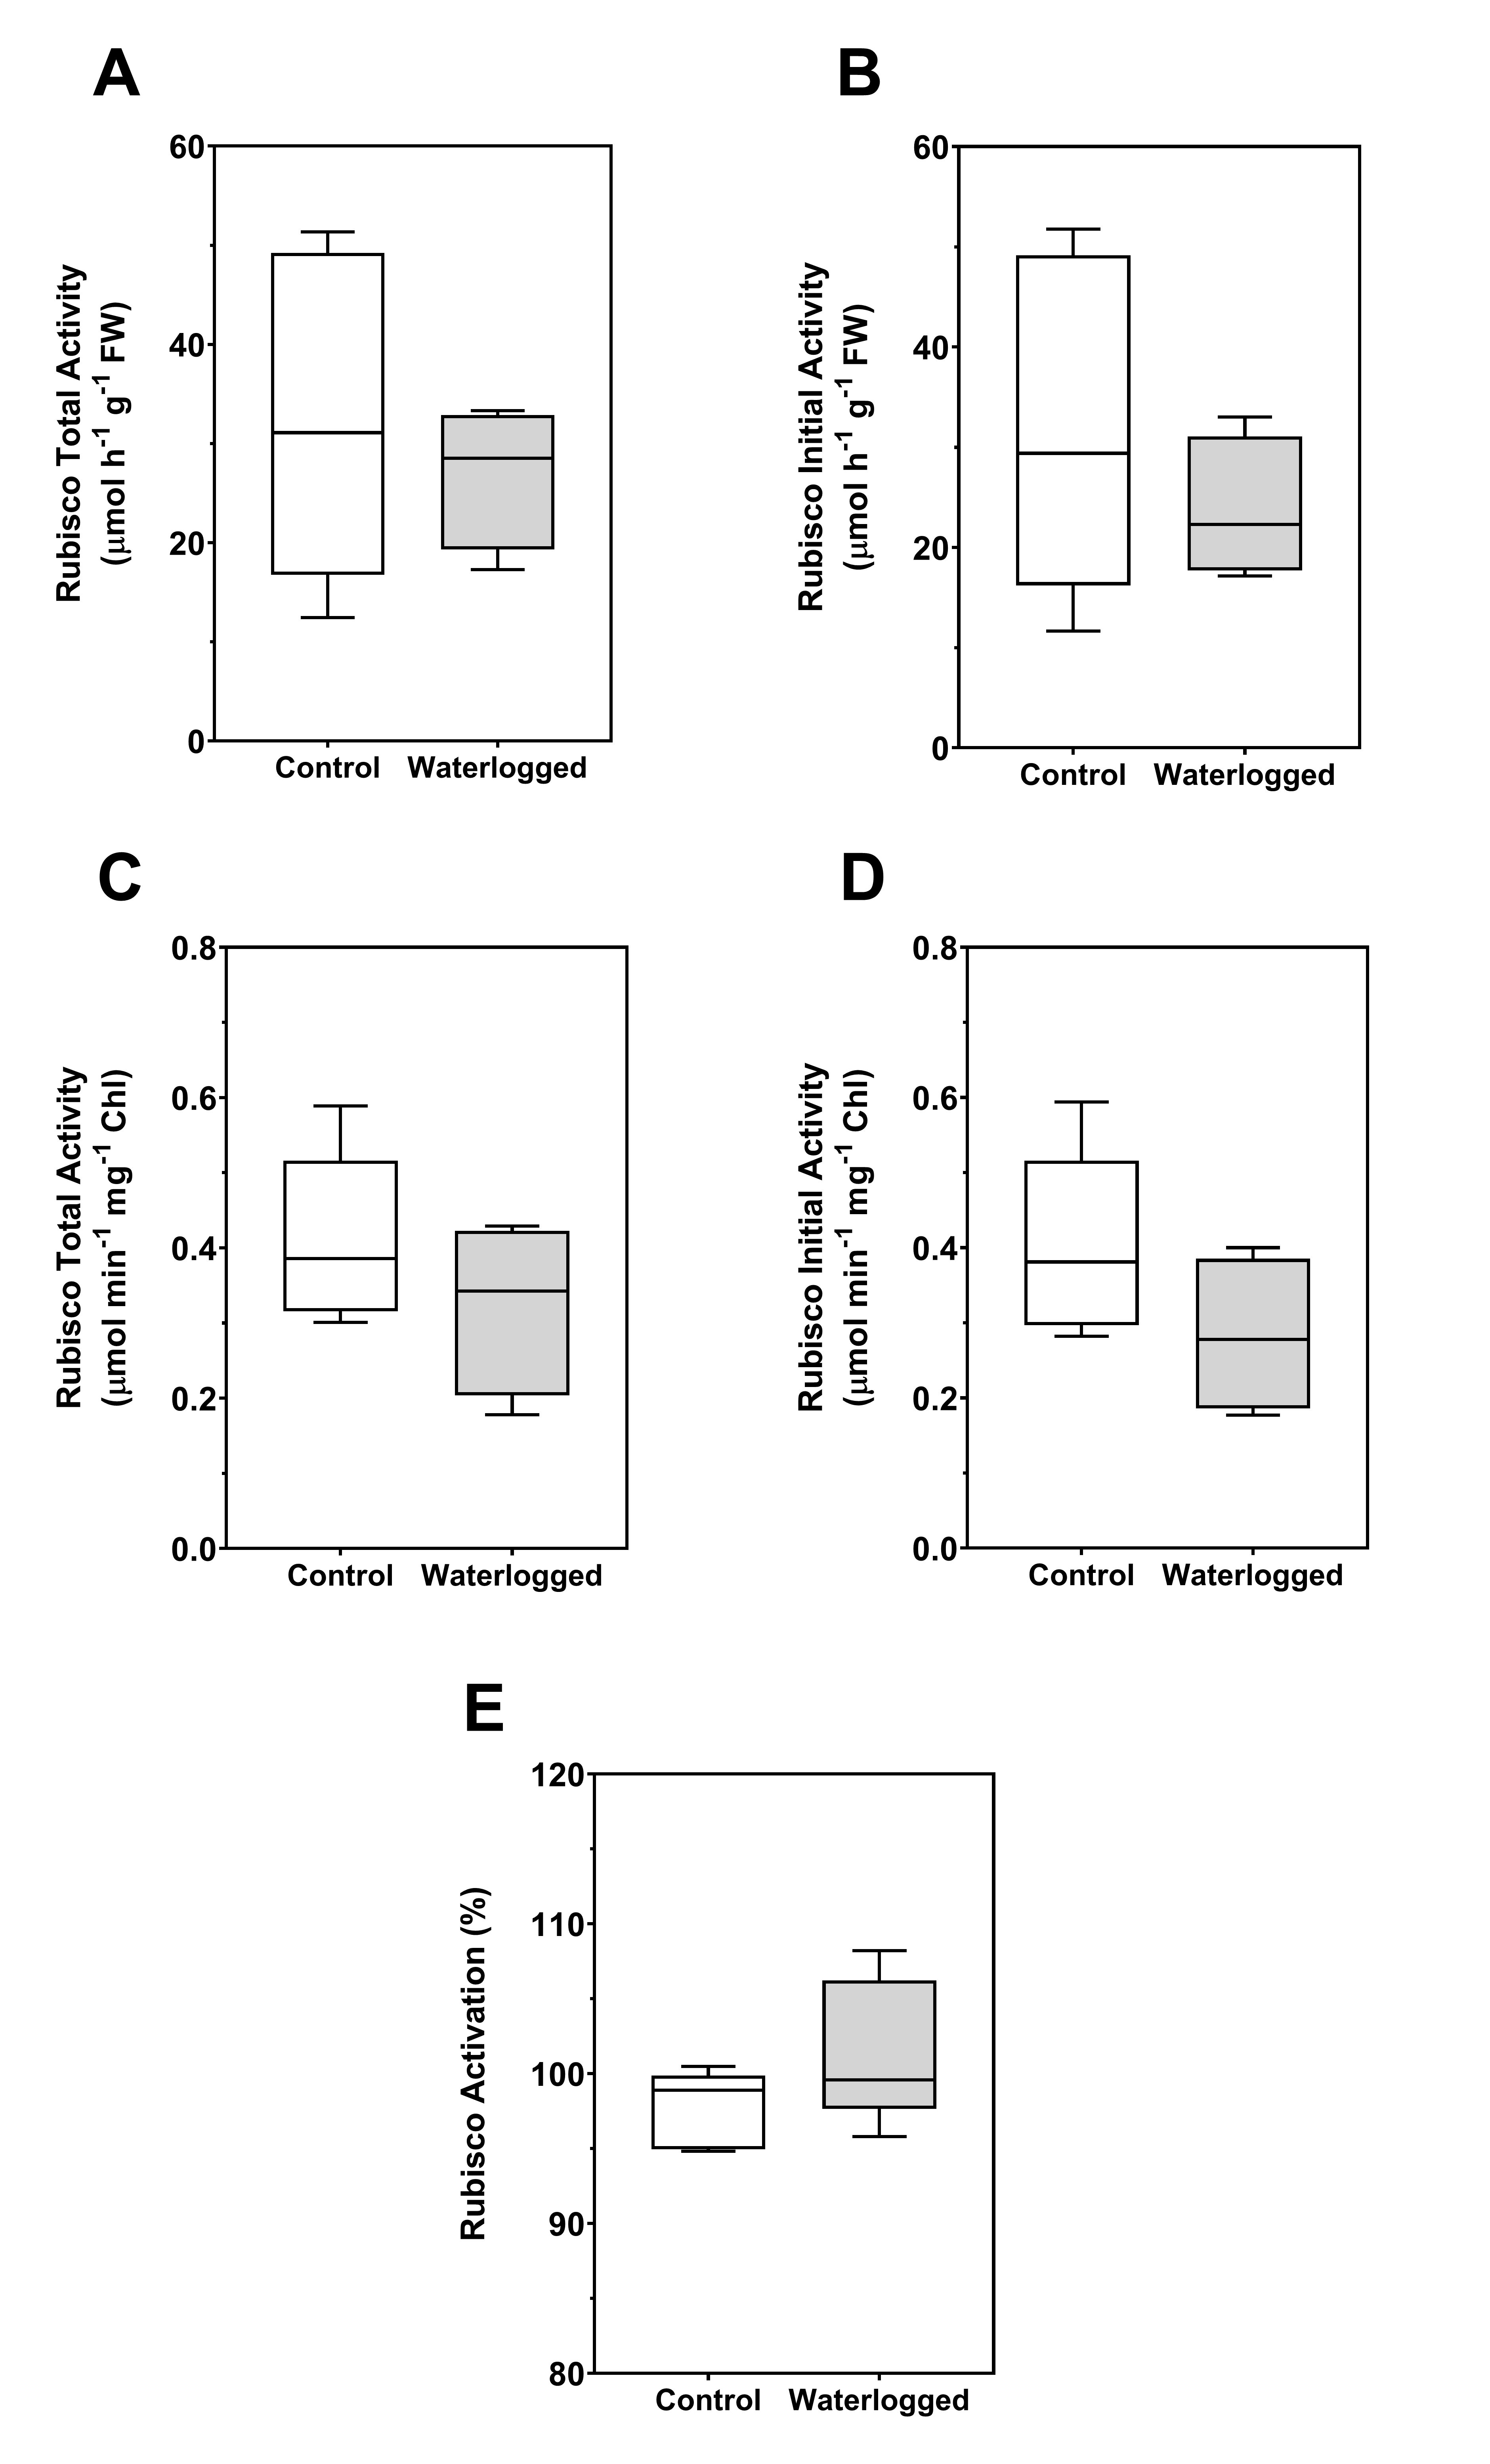


**Figure S2.** Boxplot of the Rubisco total activity (**A**, **C**), Rubisco initial activity (**B**, **D**), expressed by fresh weight (FW) (**A**, **B**) and chlorophyll content (**C**, **D**), and activation state of Rubisco (**E**) in leaves of control plants (white boxes) and waterlogged plants (grey boxes) of *Spartina patens* after 30 days (n = 5, different letters indicate significant differences at p < 0.05).


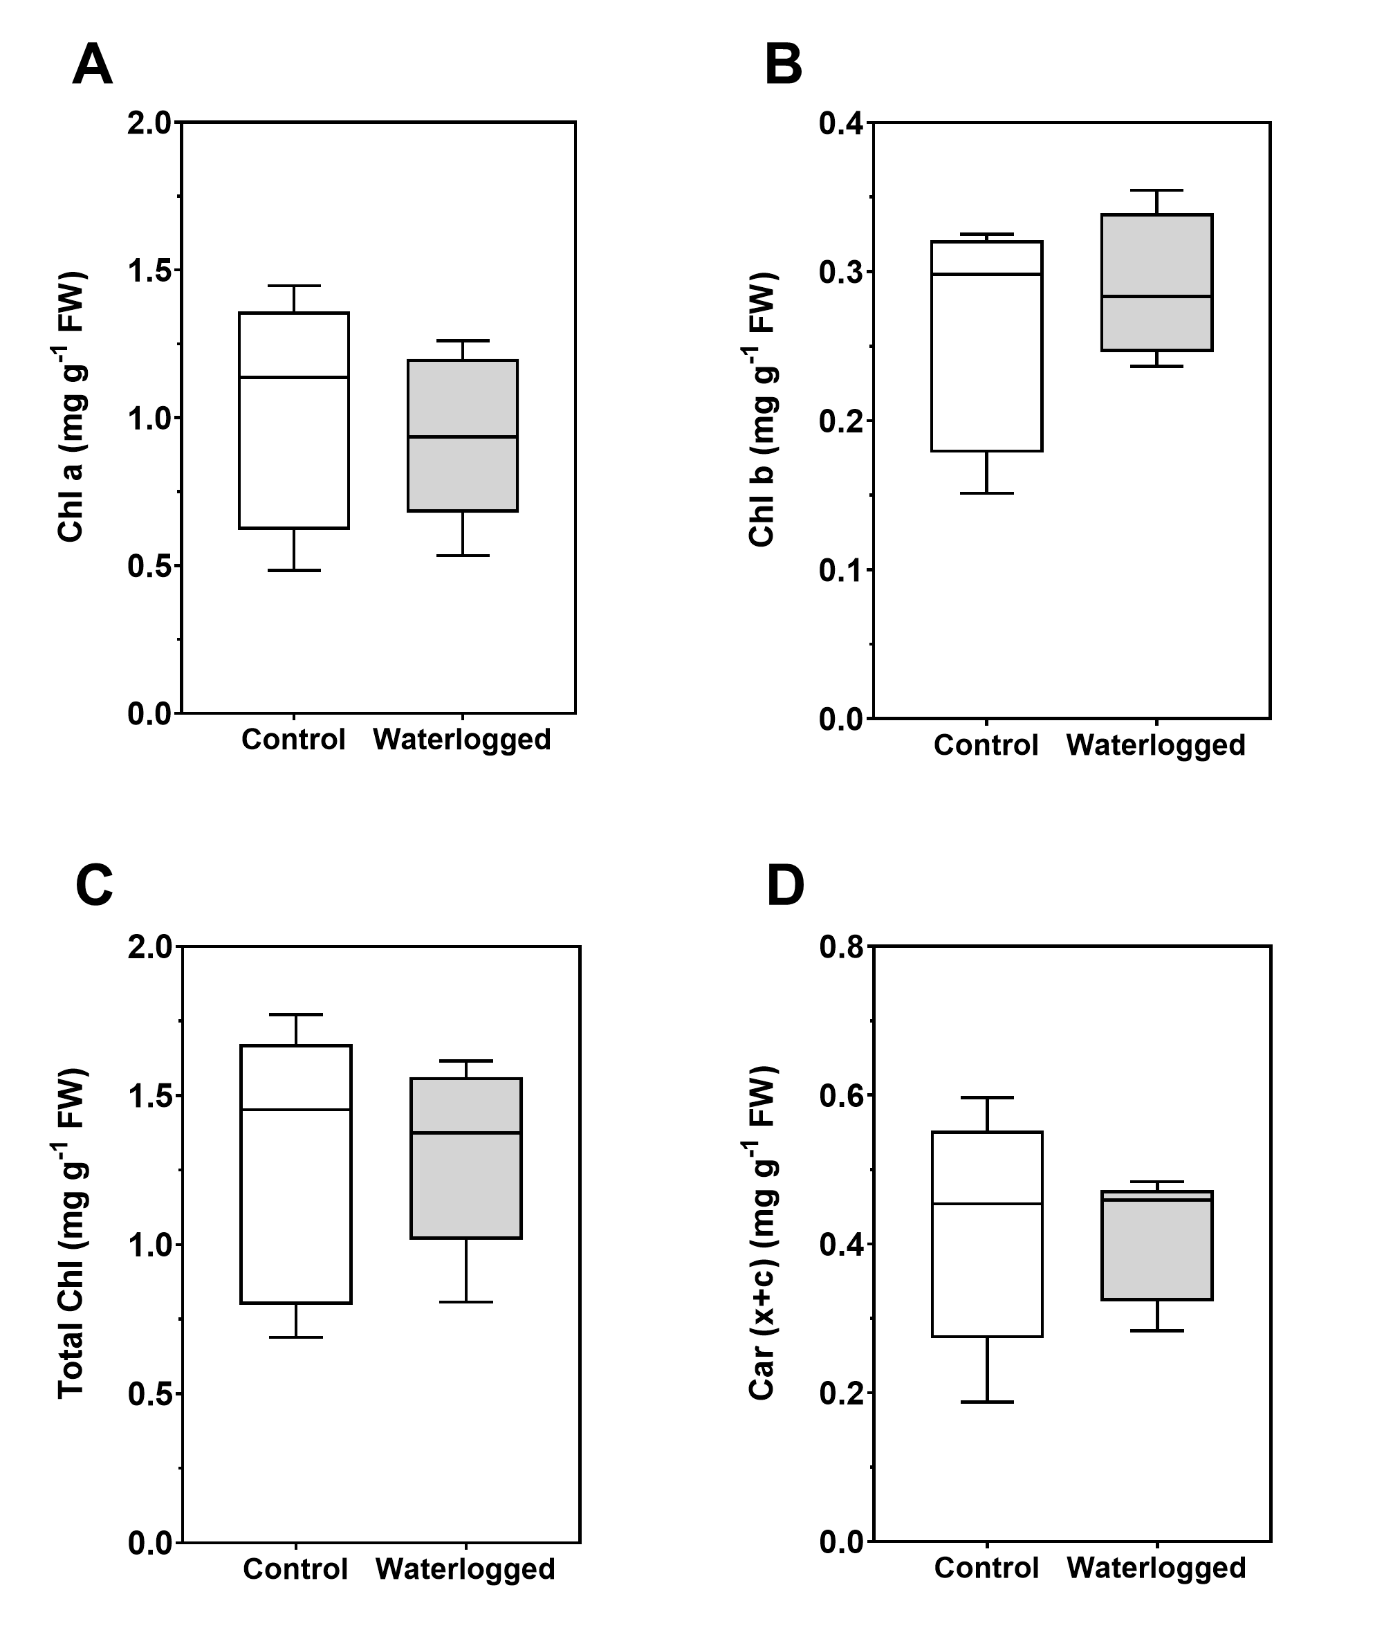


**Figure S3.** Boxplot of Chl a (**A**), Chl b (**B**), total Chl (**C**) and carotenoids (**D**) in leaves of control plants (white boxes) and waterlogged plants (grey boxes) of *Spartina patens* after 30 days (n = 5, different letters indicate significant differences at p < 0.05).


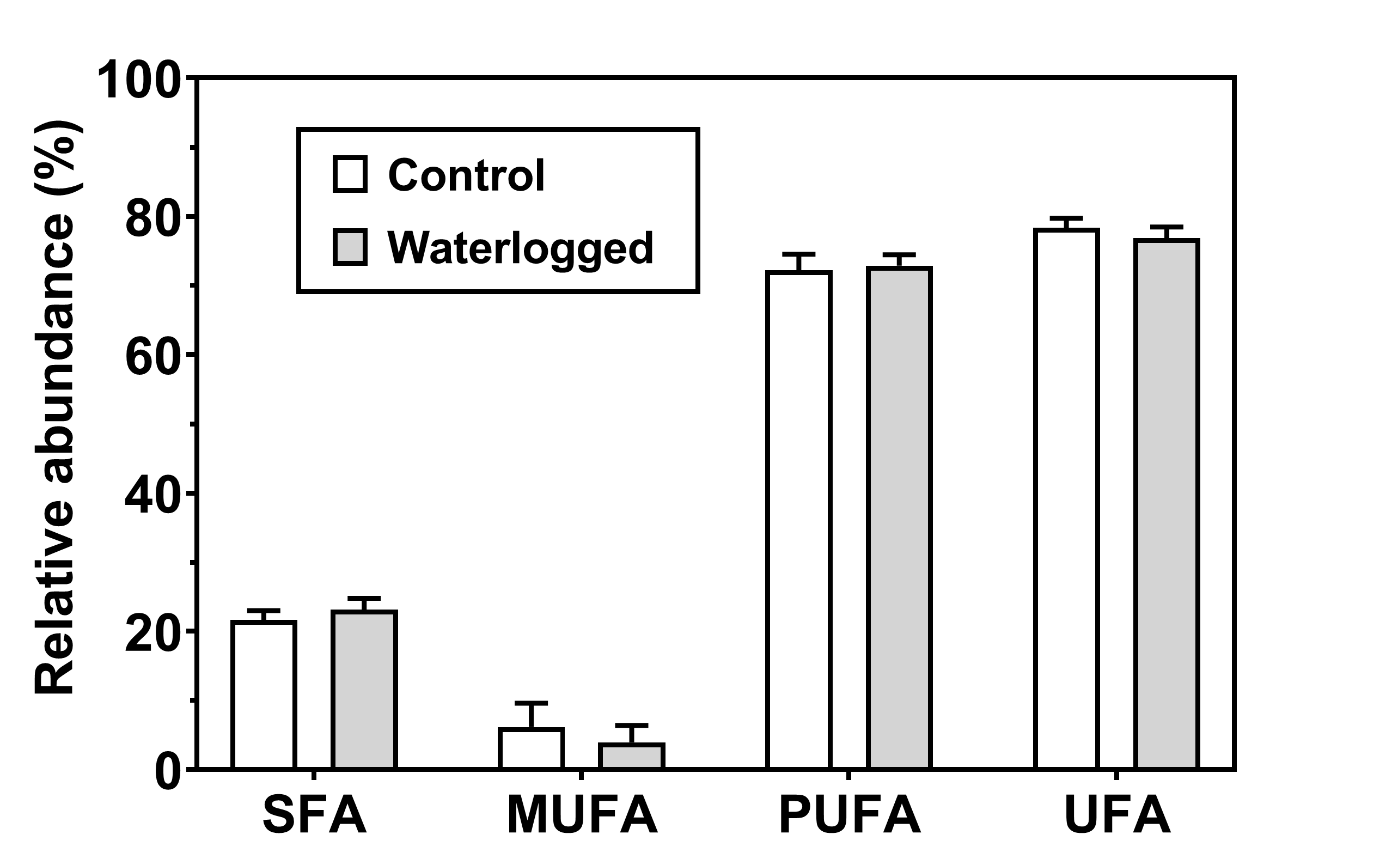


**Figure S4.** Major fatty acids classes (saturated fatty acids (SFA), monounsaturated fatty acids (MUFA), polyunsaturated fatty acids (PUFA) and unsaturated fatty acids (UFA)) relative abundance in leaves of control plants (white boxes) and waterlogged plants (grey boxes) of *Spartina patens* after 30 days (n = 5, different letters indicate significant differences at p < 0.05).


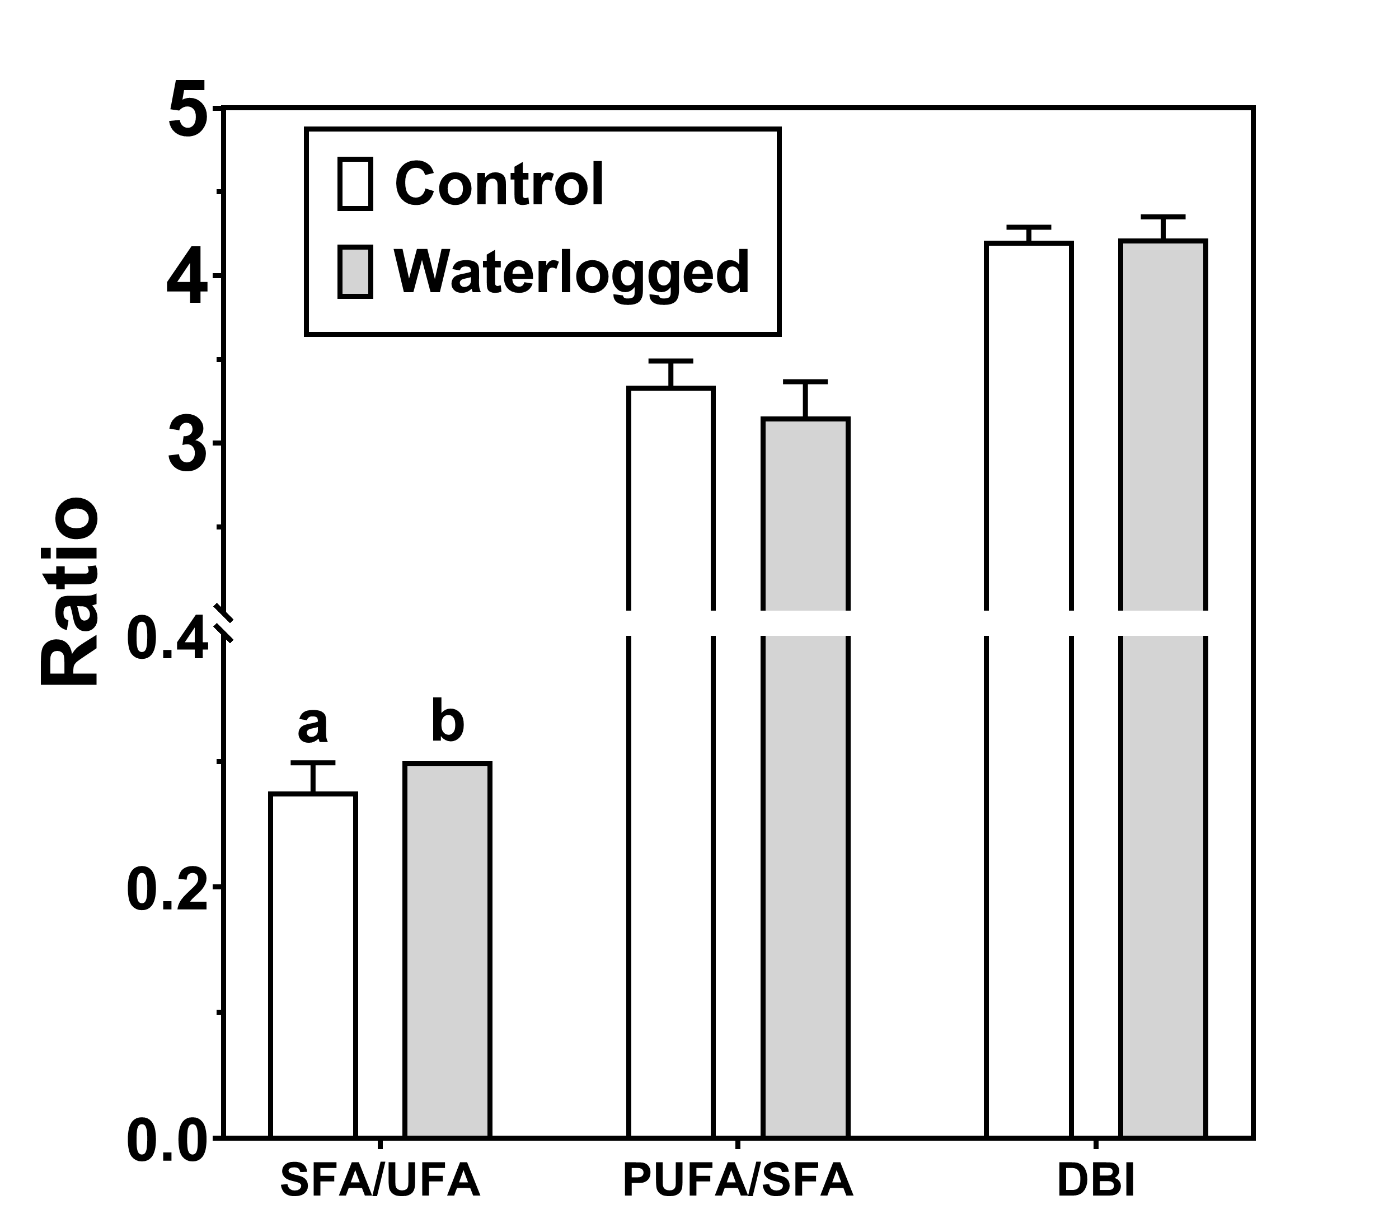


**Figure S5.** Fatty acid ratios (saturated to unsaturated fatty acids ratio (SFA/UFA), polyunsaturated to saturated fatty acids ratio (PUFA/SFA) and double-bound index (DBI)) in leaves of control plants (white boxes) and waterlogged plants (grey boxes) of *Spartina patens* after 30 days (n = 5, different letters indicate significant differences at p < 0.05).
